# Supplementary material for: Isolation of Carboxylic Acids and NaOH from Kraft Black Liquor with a Membrane-Based Process Sequence
Source: MDPI journal article supplement (doi:10.3390/membranes13010092), 2023-01-10
Supplement: s1 [file s1]

Supporting Information for

# Isolation of Carboxylic Acids and NaOH from Kraft Black Liquor with a Membrane-Based Process Sequence

Silvia Maitz, Lukas Wernsperger and Marlene Kienberger \*

Institute of Chemical Engineering and Environmental Technology, Graz University of Technology,  
Inffeldgasse 25c, 8010 Graz, Austria

\* Correspondence: marlene.kienberger@tugraz.at

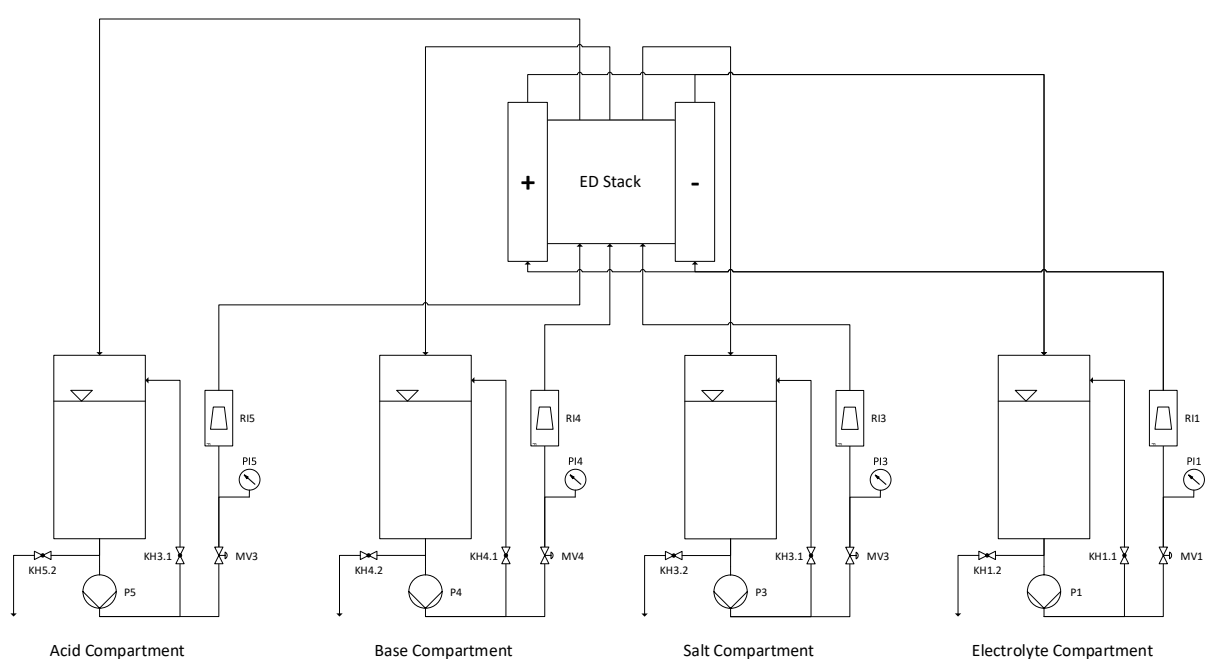

**Figure S1.** Set-up of the laboratory scale electro dialysis system.

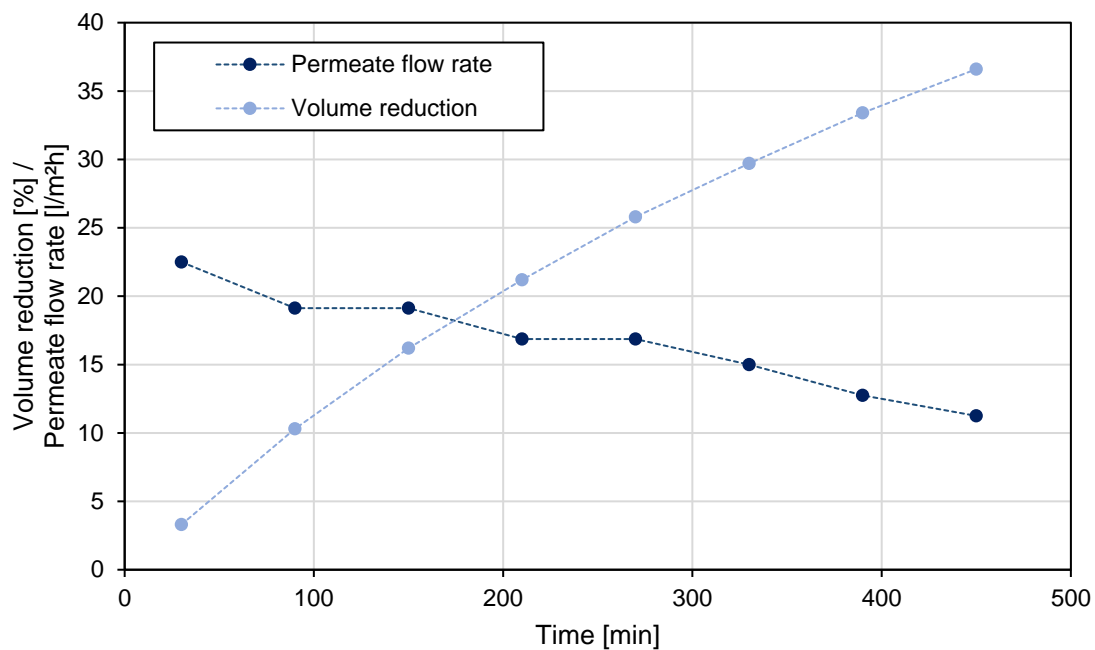

**Figure S2.** Development of permeate flow rate and volume reduction during a typical NF treatment of pre-treated kraft BL. Transmembrane pressure: 32 bar; temperature: 60 °C.

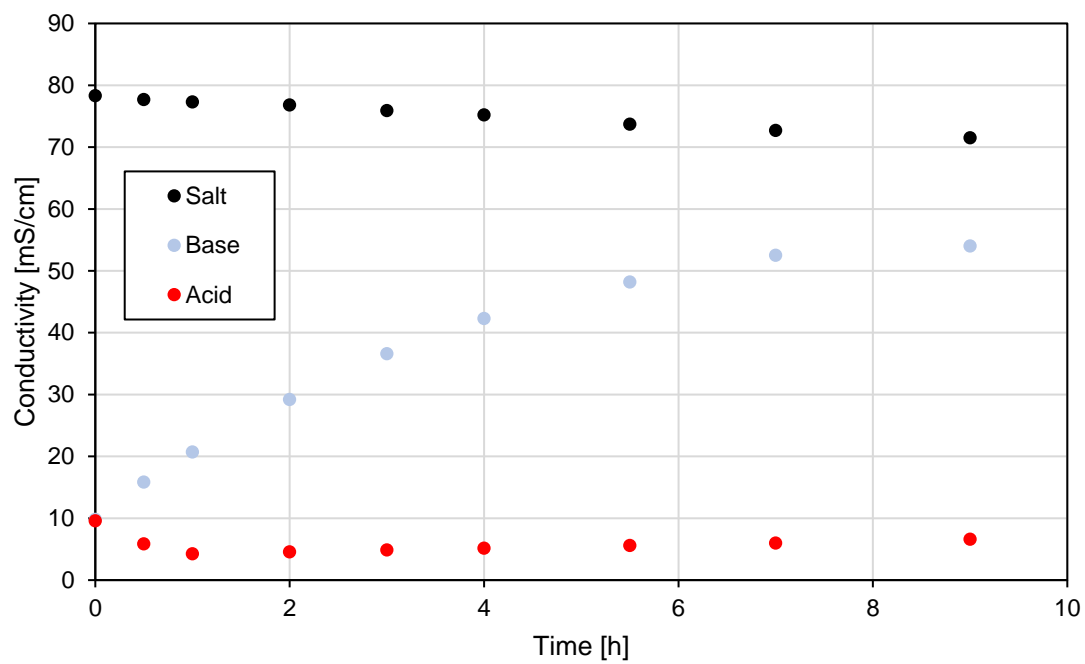

**Figure S3.** Development of the conductivity in the three different compartments during EDBM treatment of BL permeate.
